# Supplementary material for: Capacitive deionization for nutrient recovery from wastewater with disinfection capability
Source: Royal Society of Chemistry journal article supplement (doi:10.1039/c7ew00350a), 2017-10-17
Supplement: c7ew00350a1.pdf [file c7ew00350a1.pdf]

1 **Page: 3 Figure: 1; Table: 2**

2

3

### **Supporting Information**

4

5 **Capactive Removal and Recovery of Nutrients from Wastewater with Disinfection**

6

### **Capability**

7

8 Zheng Ge<sup>†</sup>, Xi Chen<sup>†</sup>, Xia Huang<sup>‡</sup>, and Zhiyong Jason Ren<sup>†,\*</sup>

9 <sup>†</sup>Department of Civil, Environmental, and Architectural Engineering, University of Colorado

10

Boulder, Boulder, Colorado 80309, United States

11

<sup>‡</sup> State Key Joint Laboratory of Environment Simulation and Pollution Control, School of

12

Environment, Tsinghua University, Beijing, 100084, P. R. China

13

14 \* Corresponding author: E-mail: [zhiyong.ren@colorado.edu](mailto:zhiyong.ren@colorado.edu);

15 Phone: 303-492-4137; fax: 303-492-7317

16

17

18

19

20

21

22

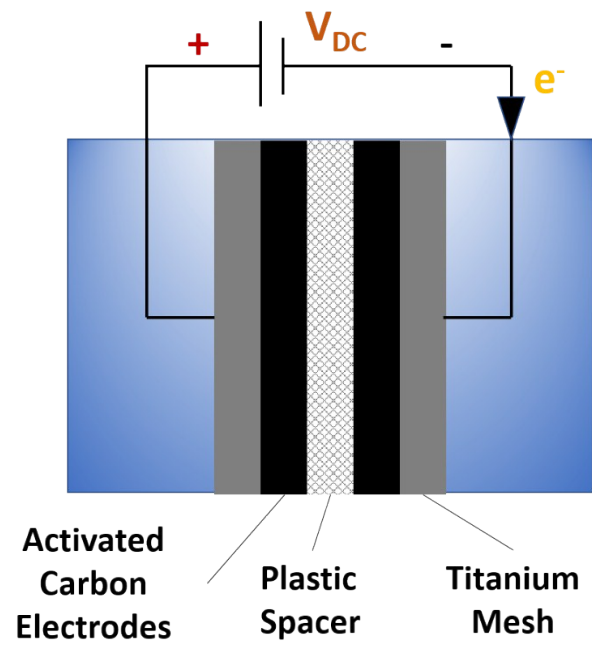

23

24 **Figure S1.** Schematic of electro-sorption device

25

26

27

28

29

30

31

32

33

34

35

36

37

38

39

40

41

42 **Table S1** Reduction of conductivity, NH<sub>4</sub>-N, and PO<sub>4</sub>-P under different voltage input

43

| Voltage (V) | Conductivity (us/cm) |          |              |                        | NH <sub>4</sub> <sup>+</sup> -N (mg/L) |             |              |                       | PO <sub>4</sub> <sup>3-</sup> -P (mg/L) |               |              |                       |
|-------------|----------------------|----------|--------------|------------------------|----------------------------------------|-------------|--------------|-----------------------|-----------------------------------------|---------------|--------------|-----------------------|
|             | Initial              | Final    | Removal (%)  | Removal rate (us/cm/h) | Initial                                | Final       | Removal (%)  | removal rate (mg/g/h) | Initial                                 | Final         | Removal (%)  | removal rate (mg/g/h) |
| 1.2         | 267<br>±8            | 59<br>±1 | 77.5<br>±0.4 | 37.8<br>±3.1           | 18.2<br>±0.6                           | 7.1<br>±0.1 | 60.5<br>±1.6 | 0.023<br>±0.003       | 3.46<br>±0.21                           | 1.56<br>±0.72 | 46.4<br>±1.5 | 0.0031<br>±0.0007     |
| 1.8         | 267<br>±8            | 44<br>±2 | 83.1<br>±1.0 | 46.4<br>±1.8           | 18.2<br>±0.6                           | 2.7<br>±0.1 | 84.9<br>±0.2 | 0.036<br>±0.001       | 3.46<br>±0.21                           | 1.04<br>±0.04 | 71.0<br>±1.0 | 0.0051<br>±0.0005     |
| 2.4         | 267<br>±8            | 57<br>±2 | 78.4<br>±1.0 | 48.0<br>±2.0           | 18.2<br>±0.6                           | 2.0<br>±0.1 | 89.2<br>±0.2 | 0.046<br>±0.002       | 3.46<br>±0.21                           | 1.02<br>±0.11 | 72.3<br>±2.7 | 0.0065<br>±0.0002     |
| 3.0         | 267<br>±8            | 23<br>±2 | 91.2<br>±1.0 | 54.2<br>±3.0           | 18.2<br>±0.6                           | 0.8<br>±0.1 | 95.7<br>±0.4 | 0.054<br>±0.002       | 3.46<br>±0.21                           | 0.69<br>±0.03 | 80.7<br>±0.7 | 0.0073<br>±0.0004     |

44

45

46 **Table S2** Energy consumption of CDI with different operation voltage input

| Energy Consumption (kWh/m <sup>3</sup> ) | 1.2 V       | 1.8 V       | 2.4 V       | 3.0 V       |
|------------------------------------------|-------------|-------------|-------------|-------------|
| 6 hr                                     | 0.045±0.023 | 0.164±0.012 | 0.270±0.023 | 0.558±0.006 |
| 12 hr                                    | 0.092±0.048 | 0.289±0.021 | 0.439±0.042 | 0.873±0.007 |

47
